# Supplementary material for: Triple-helix molecular switch-induced hybridization chain reaction amplification for developing a universal and sensitive electrochemical aptasensor
Source: Royal Society of Chemistry journal article supplement (doi:10.1039/c6ra19526a), 2016-01-01
Supplement: c6ra19526a1.pdf [file c6ra19526a1.pdf]

## Electronic Supplementary Information

### **Triple-helix molecular switch-induced hybridization chain reaction amplification for developing universal and sensitive electrochemical aptasensor**

*Qiaoqiao Liu, Jinquan Liu, Dinggeng He, Taiping Qing, Xiaoxiao He\*, Kemin Wang\*  
and Yinfei Mao*

State Key Laboratory of Chemo/Biosensing and Chemometrics, College of Biology, College of Chemistry and Chemical Engineering, Key Laboratory for Bio-Nanotechnology and Molecular Engineering of Hunan Province, Hunan University, Changsha 410082, China.

\*To whom correspondence should be addressed. Tel: 86-731-88821566; Fax: 86-731-88821566; E-mail: kmwang@hnu.edu.cn. xiaoxiaohe@hnu.edu.cn

**Table S1.** Oligonucleotides used in this work.

| Entry   | Sequence                                                         |
|---------|------------------------------------------------------------------|
| CP      | TTTTTTGTGTGTGTGT                                                 |
| TFO     | AGAGAGAGAGAGGGAAAGAGAGAGACACACACAC                               |
| APT-Ade | CTCCCTTTACCTGGGGGAGTATTGCGGAGGAAGGTTTTCCCTC                      |
| APT-Tmb | TCCCTTTGGTTGGTGTGGTTGGTTTTCCCT                                   |
| H1      | TTTTTTTTTTCTCTCTCTTTCCCTCTCTCTCTCTCGGCAGAGAGAGAGAGG<br>GAAAG     |
| H2      | TTTTTTTTTTAGAGAGAGAGAGGGAAAGAGAGAGCTTTCCCTCTCTCTCT<br>C<br>TGCCG |

**Table S2.** Comparison of different aptasensor methods for adenosine detection.

| Method                   | Detection limit (nM) | Linger range (nM) | References |
|--------------------------|----------------------|-------------------|------------|
| Fluorescence             | 101                  | 200-900           | [1]        |
| Fluorescence             | 420                  | 1-100000          | [2]        |
| Electrochemiluminescence | 5.0                  | 10-100            | [3]        |
| Electrochemical          | 2.5                  | 10-400            | [4]        |
| Electrochemical          | 10.0                 | 10-1000           | [5]        |
| Electrochemical          | 0.6                  | 10-200            | This work  |

**Table S3.** Determination of adenosine in fetal bovine serum samples.

| Samples | Spiked concentration (nM) | Detected concentration (nM) | Relative error (%) |
|---------|---------------------------|-----------------------------|--------------------|
| 1       | 50                        | 45.86                       | 8.28               |
| 2       | 100                       | 93.56                       | 6.44               |
| 3       | 200                       | 183.04                      | 8.48               |

**Table S4.** Comparison of different aptasensor methods for Tmb detection.

| Method          | Detection limit (nM) | Linger range (nM) | References |
|-----------------|----------------------|-------------------|------------|
| Fluorescence    | 2                    | 2-50              | [6]        |
| Fluorescence    | 8.4                  | 50-900            | [7]        |
| Electrochemical | 16                   | 20-2000           | [8]        |
| Electrochemical | 14                   | 20-200            | [9]        |
| Electrochemical | 0.86                 | 1-500             | [10]       |
| Electrochemical | 0.0709               | 1-500             | This work  |

**Table S5.** Determination of Tmb in fetal bovine serum samples.

| Samples | Spiked concentration (nM) | Detected concentration (nM) | Relative error (%) |
|---------|---------------------------|-----------------------------|--------------------|
| 1       | 50                        | 47.22                       | 4.56               |
| 2       | 100                       | 93.58                       | 6.42               |
| 3       | 500                       | 460.64                      | 7.87               |

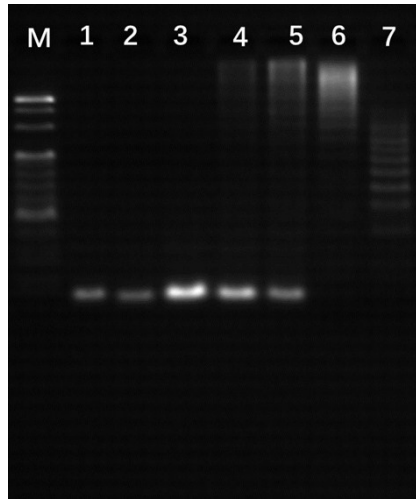

**Fig. S1.** 3% agarose gel electrophoresis demonstrates TFO-initiated HCR: lane M, 25 bp marker; lane 1, 1  $\mu$ M H1; lane 2, 1  $\mu$ M H2; lane 3, mixture of 1.0  $\mu$ M H1 and 1  $\mu$ M H2; lanes 4-7, mixture of 1  $\mu$ M H1 and 1  $\mu$ M H2 in the presence of TFO with different concentration (100 nM, 200 nM, 500 nM and 1  $\mu$ M). SYBR gold was used as the DNA stain and mixed with the samples. HCR time: 2 h.

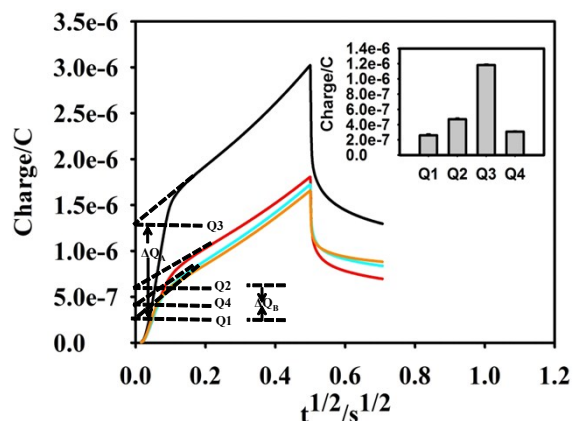

**Figure S2.** The CV intensities response of (a) the CP/MCH modified gold electrode (Q1, black line), (b) the CP/MCH/TFO modified gold electrode (Q2, green line), (c) the CP/MCH/TFO modified gold electrode after treated with the mixture solution of the two hairpin probes (Q3, blue line) and (d) the CV response signal of the CP/MCH modified electrode treated with the THMS and the solution containing two hairpin probes sequentially in the absence of target (Q4, red line).  $\Delta Q_A = Q3 - Q1$ ,  $\Delta Q_A$  was the variation in the redox charge of  $[\text{Ru}(\text{NH}_3)_6]^{3+}$  with HCR, and  $\Delta Q_B = Q2 - Q1$ ,  $\Delta Q_B$  was the variation in the redox charge of  $[\text{Ru}(\text{NH}_3)_6]^{3+}$  without HCR. Intercepts at  $t = 0$  in CV curves represented redox charges of  $[\text{Ru}(\text{NH}_3)_6]^{3+}$  trapped in DNA. Inset is a bar diagram with a standard error to show the reproducibility of Feasibility investigation. Error bars show the standard deviation of three experiments ( $n=3$ ). CV measurements were obtained at a pulse period of 250 ms in 10 mM Tris-HCl buffer containing 50  $\mu\text{M}$   $[\text{Ru}(\text{NH}_3)_6]^{3+}$  (PH 7.4).

## Notes and references

- 1 H. H., S. Shi, X. Gao, R. Gao, Y. Zhu, X. Wu, R. Zang and T. Yao, *Biosens. Bioelectron.*, 2016, **79**, 198-204.
- 2 J. Sun, W. Jiang, J. Zhu, W. Li and L. Wang, *Biosens. Bioelectron.*, 2015, **70**, 15-20.
- 3 X. Wang, P. Dong, P. He and Y. Fang, *Anal. Chim. Acta*, 2015, **658**, 128-132.
- 4 D. Wu, X. Ren, L. Hu, D. Fan, Y. Zheng and Q. Wei, *Biosens. Bioelectron.*, 2015, **74**, 391-397.
- 5 F. Yan, F. Wang and Z. Chen, *Sens. Actuators, B*, 2011, **160**, 1380-1385.
- 6 A. Bini, M. Minunni, S. Tombelli, S. Centi and M. Mascini, *Anal. Chem.*, 2007, **79**, 3016-3019.
- 7 Y. Zhu, X. Hu, S. Shi, R. Gao, H. Huang, Y. Zhu, X. Lv and T. Yao, *Biosens. Bioelectron.*, 2016, **79**, 205-212.
- 8 H. Nie, Z. Yang, S. Huang, Z. Wu, H. Wang, R. Yu and J. Jiang, *Small*, 2012, **8**, 1407-1414.
- 9 X. Liu, L. Shi, X. Hua, Y. Huang, S. Su, Q. Fan, L. Wang and W. Huang, *ACS Appl. Mater. Interfaces*, 2014, **6**, 3406-3412.
- 10 Y. Mao, J. Liu, D. He, X. He, K. Wang, H. Shi and L. Wen, *Talanta*, 2015, **143**, 381-387.
